# Supplementary material for: Long Non-Coding RNA THOR Depletion Inhibits Human Non-Small Cell Lung Cancer Cell Growth
Source: PubMed Central journal article supplement (PMC8635526; doi:10.3389/fonc.2021.756148), 2021-11-17

**Figure 2B**

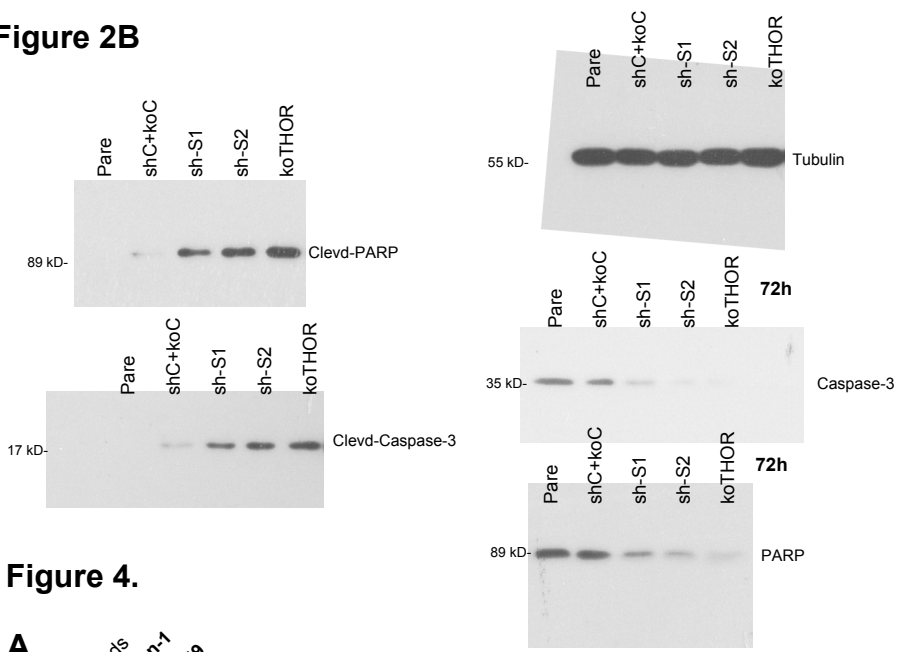

**Figure 4.**

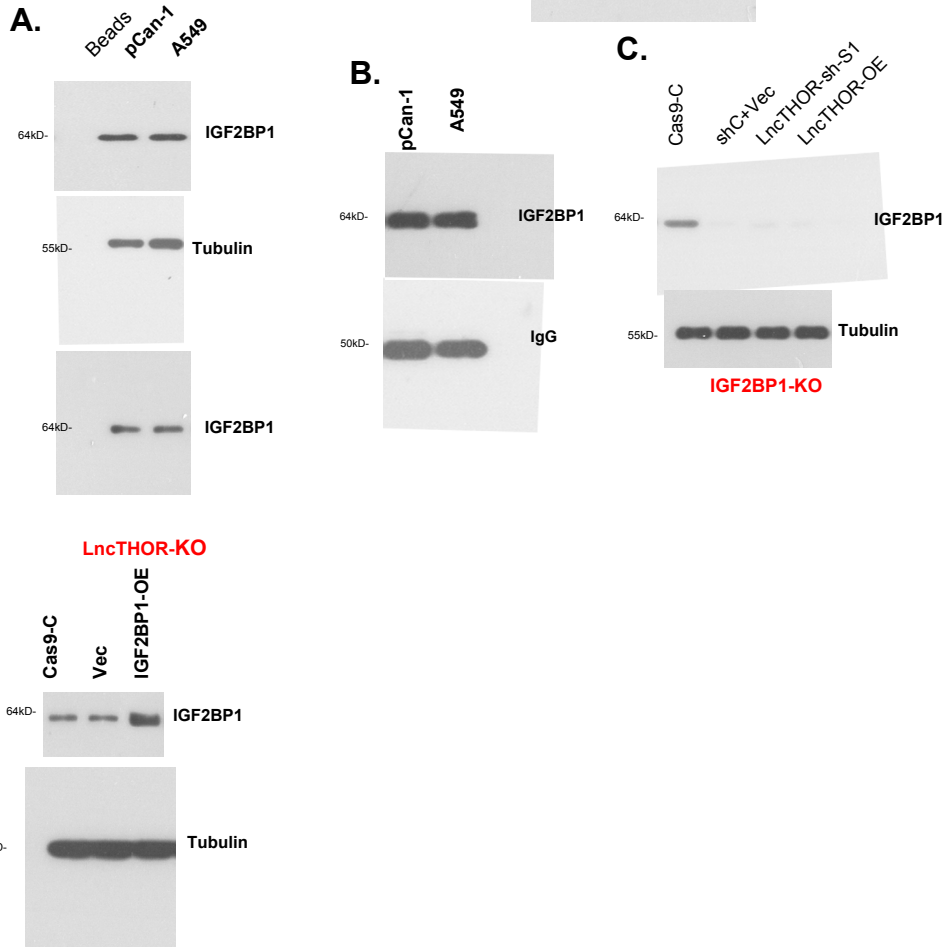

Supplement: DataSheet_1.pdf [file DataSheet_1.pdf]
